# Supplementary material for: Up-conversion of lanthanide ions and down-conversion defect luminescence in BaGdF5:Yb,Er/Tm for application in anti-counterfeiting
Source: Royal Society of Chemistry journal article supplement (doi:10.1039/d1nj03262c), 2021-01-01
Supplement: d1nj03262c1.pdf [file d1nj03262c1.pdf]

Electronic Supplementary Material (ESI) for New Journal of Chemistry.

## Supporting Information

**Up-conversion of lanthanide Ions and Down-conversion Defect Luminescence in  
BaGdF<sub>5</sub>:Yb,Er/Tm for Application in Anti-counterfeiting**

*Wenjing Liu<sup>a</sup>, Wenjun Zhang\*<sup>a</sup>, Ruxin Liu<sup>a</sup>, Guojing Li<sup>a</sup>*

**<sup>a</sup> School of Chemical Engineering, Hebei University of Technology  
Tianjin, 300130, China.**

**\* E-mail: [wjzhang@hebut.edu.cn](mailto:wjzhang@hebut.edu.cn)**

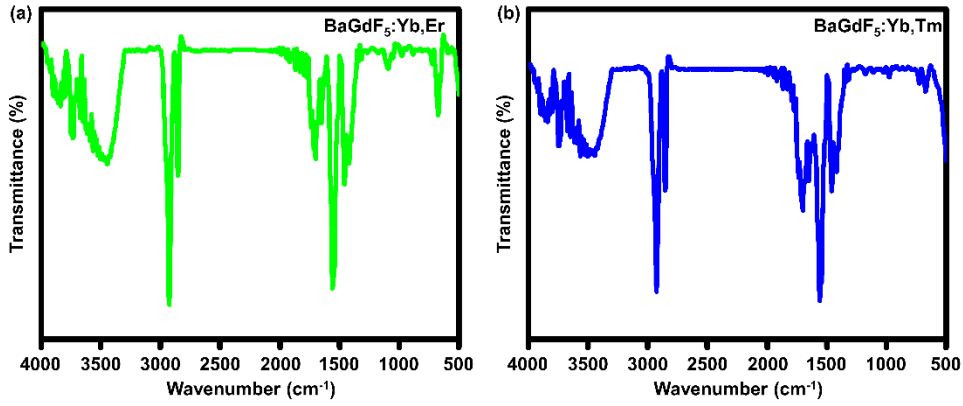

Fig. S1 FT-IR spectra of (a) BaGdF<sub>5</sub>:Yb,Er and (b) BaGdF<sub>5</sub>:Yb,Tm.

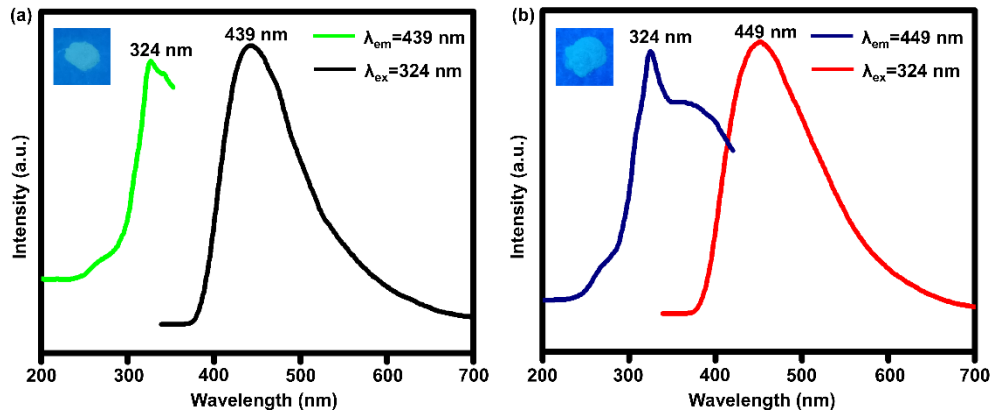

Fig. S2 (a) Excitation spectrum ( $\lambda_{em} = 439$  nm, left) and emission spectra ( $\lambda_{ex} = 324$  nm, right) of BaGdF<sub>5</sub>:Er,Tm (b) excitation spectrum ( $\lambda_{em} = 449$  nm, left) and emission spectra ( $\lambda_{ex} = 324$  nm, right) of BaGdF<sub>5</sub>:Yb,Tm (the illustration is the corresponding fluorescence diagram of two solid powder samples under the excitation of 365 nm).

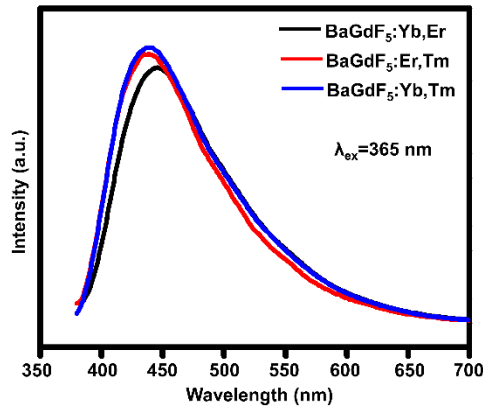

Fig. S3 The emission spectra of BaGdF<sub>5</sub>:Yb,Er, BaGdF<sub>5</sub>:Er,Tm and BaGdF<sub>5</sub>:Yb,Tm under the excitation of 365 nm.

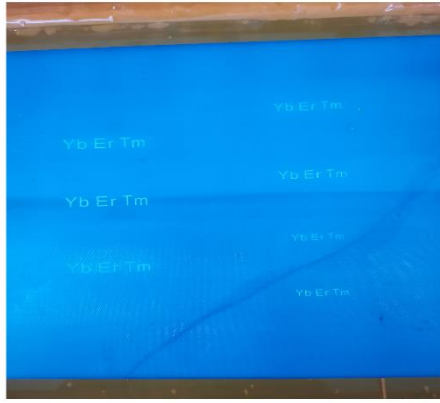

**Fig. S4** The image of screen printing plate.
